# 1 **Cross-cultural adaptation and psychometric evaluation** 2 **of the Yoruba version of Oswestry disability index**

3 **Short title:** Cross-cultural adaptation of the Yoruba version of the Oswestry disability  
4 index

5 Chidozie Emmanuel Mbada <sup>1,2</sup>, Oluwabunmi Esther Oguntoyinbo <sup>1</sup>, Francis

6 Oluwafunso Fasuyi <sup>3</sup>, Opeyemi Ayodiipo Idowu <sup>4\*</sup>, Adesola Christiana Odole <sup>2</sup>,

7 Olusola Ayanniyi <sup>2</sup>, Olubusola Esther Johnson <sup>1</sup>, Elkanah Ayodele Orimolade<sup>5</sup>, Ajibola

8 Babatunde Oladiran <sup>6</sup>, Francis Fatoye<sup>7</sup>

9  
10 <sup>1</sup>Department of Medical Rehabilitation, College of Health Sciences, Obafemi Awolowo  
11 University, Ile – Ife, Nigeria

12  
13 <sup>2</sup>Department of Physiotherapy, Faculty of Clinical Sciences, College of Medicine,  
14 University of Ibadan, Ibadan, Nigeria

15  
16 <sup>3</sup>Department of Physiotherapy, Faculty of Allied Health Sciences, University of  
17 Medical Sciences, Ondo, Nigeria

18  
19 <sup>4</sup>Department of Physiotherapy, School of Basic Medical Sciences, College of Medical  
20 Sciences, University of Benin, Nigeria.

21  
22 <sup>5</sup>Department of Orthopaedic Surgery and Traumatology, College of Health Sciences,  
23 Obafemi Awolowo University, Ile – Ife, Nigeria

24  
25 <sup>6</sup>Department of Orthopaedic Surgery and Traumatology, College of Medicine, Ibadan,  
26 Nigeria

27  
28 <sup>7</sup>Department of Health Professions, Faculty of Health, Psychology and Social Care,  
29 Manchester Metropolitan University, Manchester, UK

30  
31  
32  
33 \*Corresponding author  
34 Email:opeyemi.idowu@uniben.edu (O.A.I)

## 36 **Abstract**

37 **Introduction:** Low Back Pain is a common public health problem worsened by  
38 maladaptive beliefs and incongruent back pain behaviour. It is imperative to develop  
39 outcome measures to assess these beliefs among patients with chronic LBP. This study  
40 aimed to cross-culturally adapt and determine the psychometric properties of the  
41 Yoruba version of the ODI (ODI-Y).

42 **Methods:** The ODI-Y was cross-culturally adapted following the process involving  
43 forward translation, synthesis, backward translation, expert review, and pilot testing.  
44 One hundred and thirty-six patients with chronic LBP took part in the validation of the  
45 ODI-Y; 86 of these individuals took part in the test-retest reliability (within 1-week  
46 interval) of the translated instrument. Internal consistency and test-retest reliability of  
47 the ODI-Y were determined using the Cronbach's alpha and intra-class correlation.  
48 Other psychometric properties explored included the factor structure and fit, convergent  
49 validity, standard error of measurement and the minimal detectable change.

50 **Results:** The mean age of the respondents was 50.5±10.6years. The ODI-Y showed a  
51 high internal consistency, with a Cronbach's alpha ( $\alpha$ ) of 0.81. Test-retest of the Yoruba  
52 version of the ODI within 1-week interval yielded an Intra-Class Correlation coefficient  
53 of 0.89. The ODI-Y yielded a two-factor structure which accounted for 51.7% of the  
54 variance but showed poor fit. Convergent of ODI-Y with the visual analogue scale was  
55 moderate ( $r=0.30$ ;  $p=0.00$ ). The standard error of measurement and minimal detectable  
56 change of the ODI-Y were 2.0 and 5.5.

57 **Conclusions:** The ODI was adapted into the Yoruba language and proved to have a  
58 good factor structure and psychometric properties that replicated the results of other  
59 obtainable versions. We recommend it for use among Yoruba speaking patients with  
60 low-back pain.

61

62 **Keywords:** Low back pain, psychometrics, humans, translations, outcome assessment

63

## 64 **Introduction**

65 Low-Back Pain (LBP) is a major public health challenge with a high disability  
66 burden [1]. According to the 2010 Global Burden of Disease Study, LBP is among the  
67 top 10 diseases and injuries that account for the highest number of disability-adjusted  
68 life-years worldwide [2]. As a result of this, outcome tools that assess the disability  
69 resulting from LBP have become more abundant. Among the outcome tools, Roland-  
70 Morris Disability Questionnaire and Oswestry Disability Index (ODI) [3-5] are mostly  
71 recommended [6] owing to abundant reports literature on their clinimetric and  
72 psychometric properties [3,5,7,8].

73 Researchers and clinicians often use the Oswestry Disability Index (ODI) as a  
74 disease-specific questionnaire to assess pain and disability resulting from LBP [3,5,7].  
75 Fairbank et al. developed the ODI as a self-administered 10-item questionnaire [8] [8].  
76 The ODI assesses the consequences of pain on typical daily activities, including  
77 personal care, lifting, walking, sitting, standing, sleeping, sex life, social life, and  
78 travelling [8]. The anchors of the tool vary from no disability (0) to maximum disability  
79 (100) [8]. Based on psychometric properties and clinical usability, various languages  
80 translations including the Greek [9], Norwegian [10], Japanese [11], Turkish [12],  
81 Korean [13], Arabic [14], German [15], Danish [16], Iranian [17], Brazilian-Portuguese  
82 [18], Italian [19] and Tamil [20] exist. Most of these translations report excellent  
83 psychometric properties. The ODI has a Cronbach  $\alpha$  ranging from 0.71 to 0.87, an intra-  
84 class correlation coefficient from 0.84 to 0.94 and a test-retest reliability value between  
85 0.83 and 0.99 [7].

86 As cultural groups vary in disease perception and expressions and their use of  
87 various health care systems, local languages enhance the comprehensibility of outcome  
88 tools. [21]. Thus, increasing the comprehensibility and usability of outcome tools,

89 especially among non-English speakers necessitated the translation of outcome tools or  
90 questionnaires into local languages. Further, patients find outcomes translated into their  
91 local languages as easily accessible, user-friendly, and comprehensible [22]. Till date,  
92 only one translation (Hausa version) of the ODI with requisite data on validity and  
93 reliability exist [23], thus the need for translations of the ODI in other Nigeria languages  
94 [23], thus the need for translations of the ODI in other Nigeria languages.

95         Although English is the official language in Nigeria, a sizeable number of  
96 Nigerian patients are not literate in English [22]. Nigeria, as the most populous black  
97 African nation, is a multi-ethnic and multi-lingual country but with three major ethnic  
98 groups (Hausa, Igbo, and Yoruba) and with different languages. The Yoruba tribe makes  
99 up close to 40 million people [24], this should be among the largest ethnic groups of sub-  
100 Saharan Africa. Besides, other countries including the Benin Republic, Togo and Brazil  
101 speak the Yoruba language. [25,26]. Therefore, the availability of ODI in the Yoruba  
102 language will improve the uptake of the tool among Yoruba speaking patients with LBP.  
103 This study aimed to cross-culturally adapt, test the convergent validity, small detectable  
104 change, factor structure, ceiling and floor effects and test-retest reliability of the ODI  
105 among patients with LBP.

106

## 107 **Materials and methods**

### 108 **Ethical approval and informed consent**

109 The Health Research and Ethics Committee of the Obafemi Awolowo University  
110 Teaching Hospitals Complex, Ile-Ife, Nigeria gave ethical approval for this study. The  
111 respondents also gave their informed consents prior to participation in the study.  
112 Further, the respective heads of departments of the selected hospitals gave

113 administrative permission to conduct the study.

## 114 **Study design**

115 Cultural adaptation, test-retest and cross-sectional psychometric analyses.

## 116 **Instruments**

117 **The Oswestry disability questionnaire:** The ODI questionnaire is a ten 6-point  
118 questionnaire. The first segment of the tool assesses the intensity of pain, while the  
119 remaining sections assess the disabling effect of pain on typical daily activities such as  
120 personal care, lifting, walking, sitting, standing, sleeping, sex life, social life, and  
121 traveling. Each item has scores ranging from 0 to 5, with the sum of scores of the 10  
122 items expressed as a percentage of the maximum scores, varying from 0 (no disability)  
123 to 100 (maximum disability). Typically, it takes about five minutes to complete the  
124 questionnaire and less than one minute to compute scores [3].

125 **The Yoruba version of the Visual Analogue Scale (VAS):** The VAS represents the  
126 intensity dimension of pain by a 10cm line with two anchors of “no pain” and “worst  
127 pain I ever felt” [27]. The VAS assesses pain intensity, has excellent psychometric  
128 properties, and has wide applicability in clinical and research settings [27-30].  
129 Odole and Akinpelu [29] reported a moderate correlation between the English version  
130 and the translated Yoruba version of the VAS.

## 131 **Cultural adaptation of the ODI to the Yoruba Language**

132 Using a five-step guideline proposed by Guillemin, Bombardier, and Beaton [21],  
133 we translated the English version of the ODI questionnaire into the Yoruba  
134 language. The translation process in sequential order comprises:

- 135 i. Forward translation of the items and response choices of the English version of  
136 the ODI to the Yoruba language by two professionally qualified translators who

137 are both native speakers of Yoruba language and bilingual in Yoruba and  
138 English languages. One translator had information about the concepts being  
139 examined in the questionnaire. This stage involved two forward translations  
140 referred to as T1 and T2.

141 ii. Synthesis: Synthesis: The two translators and the researcher (CEM) produced  
142 a synthesized version (T3) following a reconciliation meeting.

143 iii. Back translation: Back translation: Two independent qualified English  
144 translators translated the synthesized version (T3) back into the English  
145 language (BT1 and BT2). They individually identified inconsistencies in the  
146 words and concepts of the synthesized version.

147 iv. Expert committee review: An expert committee comprising three of the  
148 researchers (CEM, OEO, and, OEJ, physiotherapists by profession) and all four  
149 translators met to discuss issues of cultural adaptations and linguistic  
150 equivalence with the original English version of ODI. The meeting produced the  
151 final version of the YORUBA ODI (T4). The expert committee made some  
152 adaptations to the ODI while translating it from the original English version.

153 Some adaptations were made to the ODI-Y while translating it from the original  
154 English version. Specifically, in section one (items 2 and 3), the Yoruba word  
155 *àfaradà* was used instead ‘*dédé*’ (which means moderate) which should have  
156 been the most suitable transliteration equivalent. However, using ‘*dédé*’ in the  
157 context will not make a meaningful sentence. In section three (Abala kéta), the  
158 word ‘*Gbígbe*’ had to be qualified in the ODI-Y, with ‘*Nnkan*’ to become ‘*Nnkan*  
159 *gbígbe*’ which means lifting. Also, item 5 in section three, was translated in the  
160 passive form, as a direct translation in the active cast may convey a different  
161 meaning, apart from that intended in the original translation. In section five

162 (Abala Karùn-ún), item 1, the term ‘favourite chair’ was changed to  
163 ‘comfortable chair’ because the term favourite chair is not commonly used in  
164 this study context. In section seven (Abala Kéje), items 2, 3 and 4, the element  
165 of time translated as àsikò was included to trade the sense of sleep duration  
166 missing in the literal equivalent of the translation in the Yoruba language.

167 v. Pilot testing: Fifteen Yoruba speaking patients with LBP filled the pre-  
168 final version of the ODI (T4). The patients also undertook individualized  
169 cognitive debriefing. The cognitive debriefing was to explore the respondents’  
170 perception, understanding, interpretation of various terminologies used, and the  
171 formatting of the translated items of the T4. Analysis of the participants’  
172 interpretation of items evaluated whether or not the adapted version retained  
173 equivalence of the items in the English version. Reports were prepared at each  
174 stage to cover issues that were faced and how they were resolved.

175

## 176 **Psychometric Testing**

177 There is no internationally accepted consensus about the minimum required sample  
178 size for validation studies. However, no less 50 participants be considered adequate for  
179 construct validity, reliability, and ceiling/floor effects analyses [31]. Based on sample  
180 size ranges in previous studies on translation of the ODI, a sample range of between 30  
181 and 126 [19, 20] was observed. Thus, a sample size estimate of 150 participants was  
182 considered adequate in this study. All the respondents in this study were recruited from  
183 three hospitals in the South-west zone of Nigeria namely: Obafemi Awolowo University  
184 Teaching Hospital complex Ile-Ife (OAUTHC), Wesley Guild Hospital, Ilesha, and  
185 University College Hospital, Ibadan. Eligibility for inclusion in the study was having a  
186 history of non-specific LBP of three months and longer, being literate in Yoruba



187 languages, and having no cognitive impairment. The diagnostic criteria for non-specific  
188 LBP included the absence of serious pathology (red flags conditions such as fracture,  
189 malignancies or infection) and radicular syndrome. Volunteers with non-specific  
190 chronic LBP but with a systemic illness, rheumatologic diseases or other co-morbidity  
191 were excluded from the study. The ODI-Y and the VAS were administered on the  
192 participants on the same day. In addition to this, socio-demographic information and  
193 anthropometric measurements were also taken. Out of the 150 consenting patients with  
194 chronic LBP consulted for the cross-sectional study, only 136 (70 males and 66  
195 females) returned their ODI-Y questionnaires validly completed. Eighty-six of the  
196 respondents completed the ODI-Y again after seven days of the first administration.

197

## 198 **Data Analysis**

199 Data were assessed for normality using visual (normal distribution curve and Q-Q plot)  
200 and statistical methods (Shapiro-Wilk's test and Skeweness/Kurtosis scores). Data were  
201 summarized using descriptive statistics of mean, standard deviation, percentages and  
202 median.

203 The reliability of the ODI-Y (an indication of how the instrument measures  
204 consistently over time) was determined using the Intra-Class Correlation (ICC). The  
205 absolute agreement, 2-way random-effects approach which assumes that errors in  
206 measurement could arise from either raters or participants) was used for the test-retest  
207 reliability of the ODI-Y. An ICC in the range of 0.4 - 0.75 was regarded as moderate,  
208 while values below and above this range were considered low and high respectively  
209 [32]. Reliability was also evaluated using the standard error of measurement (SEM) and  
210 minimal detectable change (MDC). Minimal detectable change is defined as the amount  
211 of change in a score that is required to distinguish a true performance change from a

212 change due to chance [33]. The MDC was calculated using the standard error of  
213 measurement (which is based on the standard deviation of observed test scores for a  
214 given true test score). The standard error of measurement of the ODI-Y was calculated  
215 using the formula:  $SEM = SD\sqrt{1 - R}$  [33]. Further, the MDC of the ODI-Y was  
216 calculated with the formula:  $MDC = 1.96 \times \sqrt{2} \times SEM$  [33]. Bland-Altman analysis  
217 [34] was also used to visually assess heterodascity between test-retest measurements by  
218 plotting mean scores against difference in total scores. Cronbach alpha was used to test  
219 for the internal consistency of the ODI-Y respectively. A Cronbach's alpha not less 0.7  
220 is recommended for outcome measures [35]. The validity of the ODI-Y was determined  
221 by correlating the ODI-Y scores with each of the VAS (convergent validity) and age of  
222 respondents (divergent validity) respectively. Spearman ranks correlation was used to  
223 assess the validity of the instrument.

224 Principal Factor analysis was used to determine the factor structure of the ODI-  
225 Y. Kaiser-Meyer- Olkin value, Bartlett's test of sphericity and correlation matrix table  
226 was used to check the suitability of the ODI-Y data prior to the conduction of principal  
227 component analysis (PCA). Confirmatory factor analysis (CFA) was performed using  
228 the one factor, two-factor theory-driven model (static activities: pain, sleep, standing,  
229 driving and sleeping; dynamic activities: personal care, lifting, walking, sex and social  
230 life) as suggested in the literature as well as the model obtained from the PCA. The  
231 CFA was performed using maximum likelihood estimates. To evaluate the goodness of  
232 fit of each the three models, the following indicators were used: the goodness-of-fit-  
233 index (GFI)  $\geq 0.95$ , the root mean square error of approximation (RMSEA)  $< 0.08$ ;  
234 adjustment of goodness of fit index (AGFI)  $\geq 0.90$  and the comparative fit index (CFI)  
235  $\geq 0.95$  [36]. AMOS software, version 22.0 (SPSS Inc.) was used for the SEM. Potential  
236 ceiling and floor effects were considered present if  $>15\%$  of respondents achieved the

237 lowest (10%) or highest possible total scores (100%) [31]. Data were analysed using  
238 SPSS (Statistical Package for Social Sciences) for Windows (Version 16.0. Chicago,  
239 SPSS Inc.) Alpha level was set as 0.05.

240

## 241 **Results**

242 Shapiro-Wilk's normality test ( $P < 0.05$ ), as well as the Q-Q plots observation,  
243 showed that the ODI-Y was not normally distributed. The mean age, weight, height and  
244 BMI of the respondents (51.5% females) was  $50.7 \pm 10.6$  years,  $75.0 \pm 11.2$  Kg,  
245  $1.67 \pm 0.04$  m, and  $26.71 \pm 4.23$  Kg/m<sup>2</sup> respectively. The general characteristics of the  
246 respondents by gender are presented in Table 1.

247

248 **Table 1: General characteristics of the participants by gender (N=136)**

| <b>Variables</b>         | <b>Male<br/>Mean <math>\pm</math> SD</b> | <b>Female<br/>Mean <math>\pm</math> SD</b> | <b>t-cal</b> | <b>p-value</b> |
|--------------------------|------------------------------------------|--------------------------------------------|--------------|----------------|
| Age (years)              | $48.5 \pm 10.7$                          | $52.7 \pm 10.2$                            | -2.328       | 0.021          |
| Weight (kg)              | $74.9 \pm 10.9$                          | $75.1 \pm 11.5$                            | -0.083       | 0.834          |
| Height (m)               | $1.68 \pm 0.04$                          | $1.68 \pm 0.04$                            | 0.706        | 0.482          |
| BMI (Kg/m <sup>2</sup> ) | $26.6 \pm 4.21$                          | $26.8 \pm 4.28$                            | -0.255       | 0.799          |

249 SD: Standard deviation; BMI: body mass index

250

251 The 1-week test-retest reliability of the ODI-Y using ICC was 0.80 (95% CI  
252 0.74-0.84). Further, the internal consistency of the ODI-Y was 0.81. The Item by Item  
253 Correlation between the Test-Retest of the ODI-Y and the Cronbach's Alpha if an item  
254 of the ODI-Y is deleted are presented in Tables 2 and 3 respectively. The SEM and  
255 MDC of the ODI-Y were 2.0 and 5.5. The mean difference between the test and retest  
256 scores as shown by Bland-Altman analysis was -0.26. Further, only 2 outliers affected  
257 the 95% limits of agreements. The Spearman's rank correlation coefficient for the  
258 convergent validity of the ODI-Y with the VAS was  $r=0.30$ ;  $p=0.00$ .

259

260 **Table 2: Reliability of the Yoruba version of the ODI**

|                                      |                                  |
|--------------------------------------|----------------------------------|
| Global score of the ODI ( $\alpha$ ) | 0.81                             |
| <hr/>                                |                                  |
| Item                                 | Cronbach's alpha if Item Deleted |
| 1                                    | 0.814                            |
| 2                                    | 0.783                            |
| 3                                    | 0.806                            |
| 4                                    | 0.781                            |
| 5                                    | 0.798                            |
| 6                                    | 0.775                            |
| 7                                    | 0.80                             |
| 8                                    | 0.775                            |
| 9                                    | 0.775                            |
| 10                                   | 0.784                            |

261 ODI: Oswestry disability index;  $\alpha$ ; Cronbach's alpha.

262

263

264 **Table 3: Test-retest of the Yoruba version of the ODI**

|              | ICC   | 95% CI        |
|--------------|-------|---------------|
| Global score | 0.80  | 0.74 – 0.84   |
| Item by item |       |               |
| 1            | 0.876 | 0.80-0.92     |
| 2            | 0.917 | 0.872 – 0.946 |
| 3            | 0.971 | 0.955 – 0.981 |
| 4            | 0.939 | 0.906 – 0.96  |
| 5            | 0.969 | 0.952 – 0.98  |
| 6            | 0.94  | 0.911 – 0.962 |
| 7            | 0.893 | 0.833 – 0.931 |
| 8            | 0.929 | 0.891 – 0.954 |
| 9            | 0.900 | 0.846 – 0.935 |
| 10           | 0.945 | 0.915 – 0.964 |

265 ODI: Oswestry disability index; ICC: intra-class correlation; CI: confidence interval

266

267 Principal component analysis (PCA) with Oblimin rotation was used to evaluate  
268 the factor structure of the ODI-Y. To determine that the data was suitable for factor  
269 analysis, indicators including the correlation matrix table (presence of many coefficients  
270 > 0.3), Kaiser-Meyer- Olkin measure of sampling adequacy (0.74) and Bartlett's test of  
271 sphericity ( $\chi^2=432.34$ ,  $P<0.001$ ) were considered; all of them indicated that PCA could  
272 proceed. Only factors with eigen value >1 were considered to contribute significantly to  
273 explaining variance. Factors loading >0.3 were included in the model. Initial principal  
274 components extraction yielded a total of three factors which accounted for 61.56% of  
275 the total variance of the 10 factors. The first factor, with an eigenvalue of 3.9, consisted

276 of items 2, 4, 6, 8, 9 and 10 accounting for 39.5% of the variance. The second factor,  
 277 with an eigenvalue of 1.2, consisted of items 1 and 3 accounting for 12% of the  
 278 variance. The third factor with an eigenvalue of 1.0 consisted of items 5 and 7  
 279 accounting for 10.1% of the variance. However, scree plot analysis as well as results  
 280 from a parallel analysis suggested retaining the two-factor solution. A second principal  
 281 components analysis with forced two factors extraction using the same rotation method  
 282 yielded two factors (Factor 1: items 2, 4-10; Factor 2: items 1, 3). The total variance  
 283 explained by the two factors was 51.47%. This is presented in Table 4.

284

285 **Table 4: Principal component analysis of the Yoruba version of the ODI**

| Item                        | Principal component coefficient $\geq 0.4$ |          | Communality |
|-----------------------------|--------------------------------------------|----------|-------------|
|                             | Factor 1                                   | Factor 2 |             |
| 1. Pain                     |                                            | 0.835    | 0.699       |
| 2. Personal care            | 0.662                                      |          | 0.463       |
| 3. Lifting                  |                                            | 0.686    | 0.512       |
| 4. Walking                  | 0.714                                      |          | 0.512       |
| 5. Sitting                  | 0.527                                      |          | 0.277       |
| 6. Standing                 | 0.756                                      |          | 0.585       |
| 7. Sleeping                 | 0.557                                      |          | 0.386       |
| 8. Sex                      | 0.687                                      |          | 0.551       |
| 9. Social life              | 0.714                                      |          | 0.543       |
| 10. Travelling              | 0.763                                      |          | 0.618       |
| Eigenvalue                  | 3.95                                       | 1.20     |             |
| % of the variance explained | 39.47                                      | 12.0     |             |

286 ODI: Oswestry disability index

287 The results of the goodness of fit derived from the confirmatory factor analysis  
288 of the ODI-Y showed that none of the indicators in the three models were within ranges  
289 of acceptable fit (Table 5). Further, the factor loadings of the model derived from the  
290 PCA (Fig 1) ranged from 0.4-0.74. The ODI-Y had no ceiling or floor effect as no  
291 respondent had the maximum possible score and only 2.2% of respondents had the  
292 minimum possible score.

293

294 **Table 5: Confirmatory factor analysis of the Yoruba version of the ODI**

| Model                          | $\chi^2$ | d.f. | <i>P</i> | GFI   | RMSEA | AGFI  | CFI   |
|--------------------------------|----------|------|----------|-------|-------|-------|-------|
| One factor                     | 116.7    | 35   | 0.000    | 0.879 | 0.131 | 0.810 | 0.796 |
| Theory driven Two-factor       | 114.6    | 34   | 0.000    | 0.881 | 0.132 | 0.808 | 0.799 |
| Two-factor derived from<br>PCA | 109.12   | 34   | 0.000    | 0.885 | 0.128 | 0.814 | 0.813 |

295 PCA: Principal component analysis; GFI: goodness-of-fit-index; RMSEA: root mean  
296 square error of approximation; AGFI: adjustment of goodness of fit index; CFI:  
297 comparative fit index.

298

299

## 300 Discussion

301 The test-retest of the ODI-Y within 1-week interval showed a high correlation  
302 based on ICC. The high ICC coefficient got for the ODI-Y conforms to the  
303 recommendation of an ICC of 0.75 or more, considered in many studies as reliable [8].  
304 The narrow 95% CI obtained for the ICCs in this study shows that the ODI-Y can yield  
305 reliable results when administered on multiple occasions. The test-retest reliability

306 results obtained in this study was like that reported in the Norwegian [10], Korean [13],  
307 and Brazilian-Portuguese [18] versions. From previous studies, the ICC of the  
308 ODI ranged between 0.7 and 0.99 with test-retest interval ranging from 2 days to 4  
309 weeks [37]. That only 2 outliers affected the 95% limits of agreements during the  
310 Bland-Altman analysis indicates a very strong agreement between the test and retest  
311 scores and minimal within-subject variations. The Bland-Altman analysis accounts for  
312 the shortcoming of the ICC which might indicate strong correlations between two  
313 measurements with minimal agreement [38]. The findings of this study show that the  
314 ODI-Y had a high internal consistency. A higher internal consistency  $> 0.95$  would  
315 have indicated a redundancy in the questionnaire items. The internal consistencies of  
316 most of the ODI translations [37, 39, 40] fall within this band.

317         The estimated SEM (2.0) of the ODI-Y resulted in a  $MCD_{95\%}$  of 5.5. The  
318  $MDC_{95\%}$  found in our study was like that reported in the Croatian version of the ODI  
319 (6.0) [37]. The MDC of the ODI-Y was lower than that of the Polish (MDC=10) [41];  
320 German (9.0) [15]; Hungarian (MDC=11) [42] and Chinese (12.8) [43] translations of  
321 the ODI. An MDC of 5.5 found in our study implies that below 5.5, the measurement  
322 error of the ODI-Y is indistinguishable.

323         The ODI-Y correlated with pain intensity. This finding on the convergent  
324 validity of the ODI-Y is like previous ODI translations, where the instrument often  
325 correlated with pain. For example, Norwegian (0.52) [10], Korean (0.42) [13], Swiss-  
326 German (0.78) [15], Iranian (0.54) [17] and Brazilian-Portuguese (0.66) [18] versions of  
327 the ODI, all correlated moderately with pain intensity. The positive correlation between  
328 ODI-Y and pain intensity supports the concept of the former as a measure of physical  
329 disability.



330 Principal component analysis of the ODI-Y revealed a two-factor structure  
331 accounting for 51.47% of the variance. The first factor (everyday activities) includes  
332 personal care, walking, sitting, standing, sleeping, sex life, social life, and travelling  
333 while the second factor (pain/lifting) includes pain and lifting. Most factor analyses of  
334 the language translations of the ODI yielded one factor [5, 15, 40, 44, 45] or two-factor  
335 structures [40, 37, 46, 47, 48]. The two-factor model in this study differs from the two-  
336 factor models reported by previous studies on the ODI. Such factors reported include  
337 social/ recreational activities and non-recreational activities [37], dynamic and static  
338 activities [46, 49], pain-related activity, and pain intensity and pain-related participation  
339 [39]. Further, the item loadings of the various two-factor models are dissimilar. While  
340 the theory-driven two-factor model had a better fit than each of the PCA-derived and  
341 one-factor models in this study, none had acceptable fit following CFA.

342 Gabel and colleagues [49] conducted a PCA of the ODI in a large sample of  
343 32,263 patients with LBP derived from the international Spine Tango registry of  
344 EUROSPINE. Their analysis yielded a single-factor model which was confirmed by the  
345 CFA. They further conducted a CFA on the literature-recommended two-factor model  
346 of the ODI; this yielded indicators which were not within the ranges of acceptable fit.  
347 Based on the evidence from the study by Gabel et al [49], that none of the previous two-  
348 factor models have similar factor loading, and the results from our study, it is  
349 recommended that a global score of the ODI be used in research and the clinical  
350 settings. The unidimensionality of the ODI, however, remains debatable. Larger sample  
351 size studies are thus needed to provide answers to the dimensionality of the ODI. The  
352 ODI-Y had no floor or ceiling effects. Floor and ceiling effect refers to the percentage  
353 of patients scoring maximal or minimal scores. It is recommended that questionnaires  
354 with more than 15% of the respondents scoring either the maximal or minimal scores

355 should not be used. Our study is without limitations. This study focussed only on  
356 individuals with chronic low back pain; generalizability of results may be difficult.  
357 Secondly, a Rasch analysis of the ODI-Y was not conducted. In sum, the ODI-Y  
358 showed acceptable internal consistency, test-retest reliability, convergent validity, a  
359 two-factor structure with a poor fit, and no floor or ceiling effects. The ODI-Y is  
360 recommended for assessing patients with LBP among the Yoruba population.

361

## 362 **Conclusion**

363 The Yoruba version of the ODI questionnaire is valid and reliable, with adequate  
364 psychometric properties, and it can be used in Yoruba speaking patients with low-back  
365 pain. The psychometric properties of the ODI-Y are comparable with the original  
366 English and other translations of the ODI.

367

## 368 **Acknowledgement**

369 The authors thank all the people who volunteered to participate in the study.

370

371

## 372 **References**

- 373 1. Koes BW, van Tulder MW, Thomas S. Diagnosis and treatment of low back  
374 pain. *BMJ* [Internet]. 2006 Jun 17 [cited 2018 Jul 2]; 332(7555):1430–4.  
375 Available from: <http://www.ncbi.nlm.nih.gov/pubmed/16777886>
- 376 2. Murray CJL, Lopez AD. Measuring the Global Burden of Disease. *N Engl J*  
377 *Med* [Internet]. 2013 [cited 2018 Jun 29]; 369(5):448–57. Available from:  
378 [http://www.ph.ucla.edu/epi/faculty/detels/PH150/GlobBurdDis\\_NEJM\\_2013.pdf](http://www.ph.ucla.edu/epi/faculty/detels/PH150/GlobBurdDis_NEJM_2013.pdf)  
379 [f](#)
- 380 3. Fairbank J, Couper J, Davies J, O’ Brien JP. The Oswestry low back pain  
381 disability questionnaire. *Physiotherapy*. 1980;66(8):271-273.
- 382 4. Davies CC, Nitz AJ. Psychometric properties of the Roland-Morris  
383 Disability Questionnaire compared to the Oswestry Disability Index: a  
384 systematic review. *Phys Ther Rev*. 2009;14(6):399-408.
- 385 5. Stevens ML, Lin CCW, Maher CG. The Roland Morris Disability Questionnaire  
386 [Internet]. Vol. 62, *J Physiother*. 2016 [cited 2018 Jun 29]. p. 116. Available  
387 from: [https://www.journalofphysiotherapy.com/article/S1836-9553\(15\)00123-](https://www.journalofphysiotherapy.com/article/S1836-9553(15)00123-X/pdf)  
388 [X/pdf](#)
- 389 6. Roland M, Fairbank J. Roland-Morris Disability Questionnaire & Oswestry  
390 Disability Index Questionnaire. *Spine*, 2000;25:3115-3125.
- 391 7. Vianin M. Psychometric properties and clinical usefulness of the Oswestry  
392 Disability Index. *J Chiropr Med* [Internet]. 2008 Dec [cited 2018 Jun  
393 29];7(4):161–3. Available from:  
394 <http://www.ncbi.nlm.nih.gov/pubmed/19646379>
- 395 8. Fairbank J, Pynsent P. The Oswestry Disability Index. *Spine*, 2000;25(22):2940-  
396 2952.

- 397 9. Boscainos P, Sapkas G, Stillanessi E. Greek versions of the Oswestry Disability  
398 Index and Roland Morris Disability questionnaire. *Clin Orthop*, 2003;41:40-53.
- 399 10. Grotle M, Brox J, Volleatad N. Cross-culutral adaptation of the Norwegian  
400 version of Roland Morris Disability questionnaire and Oswestry Disability  
401 Index. *J Rehabil Med*. 2003;35:241-245.
- 402 11. Fujiwara A, Kobayashi N, Saiki K. Association of Japanese Orthopaedic  
403 Association score with the Oswestry Disability index, Roland Morris Disability  
404 questionnaire and short-form 36. *Spine*, 2003;28:1601-1607.
- 405 12. Yakut E, Duger T, Oksuz C. Validation of the turkish version of the Oswestry  
406 Disability Index for patients with LBP. *Spine*, 2004;29: 581-585.
- 407 13. Kim D, Lee S, Lee H. Validtion of the korean version of the Oswestry Disability  
408 Index. *Spine*, 2005;30:123-127.
- 409 14. Guermazi M, Mezghani M, Ghroubis. The Oswestry Disability Index for low  
410 back pain translated into arabic and validated in arab population. *Ann Re-adapt  
411 Med Phys*. 2005;2005:1-10.
- 412 15. Mannion A, Junge A Fairbank J. Development of German version of oswestry  
413 disability index part 1; cross cultural adaptation, reliability and validity. *Eur  
414 Spine J*. 2005;15:55-65.
- 415 16. Lauridsen H, Hartrigsen J, Manniche C. Danish version of Oswestry Disability  
416 Index for patients with LBP part 1; cross-cultural adaptation, reliability and  
417 validity in two different populations. *Eur Spine J*. 2006;15:1705-1716.
- 418 17. Mousavi SJ, Parnianpour M, Mehdian H, Montazeri A, Mobini B. The Oswestry  
419 Disability Index, the Roland-Morris Disability Questionnaire, and the Quebec  
420 Back Pain Disability Scale: translation and validation studies of the Iranian  
421 versions. *Spine* 2006;31(14): E454-9.

- 422 18. Viggatto R, Alexandre N, Correafilho H. Development of the Brazillian-  
423 Portuguese version of the Oswestry Disabiity Index. *Spine*, 2007;32:481-486.
- 424 19. Marco M, Paola B, Silvano F. Development of the Italian version of oswestry  
425 disability index (ODI-1). A cross-cultural adaptation, reliability and validated  
426 study. *Spine*, 2009;34(19):2090-2095.
- 427 20. Vincent JI, MacDermid JC, Grewal R, Sekar VP, Balachadran D. Translation of  
428 Oswestry Disability Index into Tamil with Cross Cultural Adaptation and  
429 Evaluation of Reliability and Validity (§). *Open Orthop J* [Internet].  
430 2014;8(1):11–9.
- 431 21. Guillemin F, Bombardier C, Beaton D. Cross-cultural adaptation of health-  
432 related quality of life measures: literature review and proposed guidelines. *J*  
433 *Clin Epidemiol* 1993; 46(12): 1417-32.
- 434 22. Akinpelu AO, Maruf F, Adegoke B. Validation of a yoruba translation of the  
435 World Health Organisation's quality of life scale short form among stroke  
436 survivors in south western Nigeria. *Afr J Med Medi Sci*, 2006;35:417-424.
- 437 23. Ayanniyi O, Ajayi A, Mbada CE, Auwa MA. Validity and reliability of hausa  
438 version of the oswestry disability index. *Arch Physiother Glob Res* [Internet].  
439 2016;20(3):7–11.
- 440 24. Wikipedia Yoruba People [Internet] USA: Wikipedia; 2018 [Updated 2018 Jun  
441 25; cited 2018 Jun 29]. Available from:  
442 [https://en.wikipedia.org/wiki/Yoruba\\_people](https://en.wikipedia.org/wiki/Yoruba_people)
- 443 25. Adeuyan JO. Contributions Of Yoruba People In The Economic & Political  
444 Developments Of Nigeria [Internet]. 1st ed. Bloomington: AuthorHouse; 2011  
445 [cited 2018 Jun 29]. 300 p. Available from:  
446 <https://read.barnesandnoble.com/book/contributions-of-yoruba-people-in-the->

- 447 [economic-political-developments-of-nigeria/who-are-the-yoruba-people](#)
- 448 26. Mbada CE, Idowu OA, Ogunjimi OR, Ayanniyi O, Orimolade EA, Oladiran  
449 AB, et al. Cross-cultural Adaptation, Reliability, and Validity of the Yoruba  
450 Version of the Roland-Morris Disability Questionnaire. *Spine (Phila Pa 1976)*.  
451 2017;42(7):497–503.
- 452 27. Gould D. Visual analog scale. *J Clin Nurs*. 2001;10:697-706.
- 453 28. Conn, D.A. 2005. Assessment of acute and chronic pain. *Anaesth Intensive Care*  
454 *Med* 6:14-15.
- 455 29. Odole AC, Akinpelu AO. Translation and alternate forms reliability of the visual  
456 analogue scale in the three major Nigerian languages. *Int J Allied Health Sci*  
457 *Pract* 2009; 7:3
- 458 30. Le May S, Ballard A, Khadra C, Gouin S, Plint AC, Villeneuve E, et al. A  
459 comparison of the psychometric properties of three pain scales used in the  
460 pediatric emergency department. *Pain* [Internet]. 2018 Mar [cited 2018 Jun  
461 29];1. Available from: [http://insights.ovid.com/crossref?an=00006396-](http://insights.ovid.com/crossref?an=00006396-900000000-98994)  
462 [900000000-98994](http://insights.ovid.com/crossref?an=00006396-900000000-98994).
- 463 31. Terwee CB, Bot SD, de Boer MR, van der Windt DA, Knol DL, Dekker J, et al.  
464 Quality criteria were proposed for measurement properties of health status  
465 questionnaires. *J Clin Epidemiol*, 2007; 60: 34–42.
- 466 32. Harley SM, Fragala-Pinkham MA. Interpreting change scores of tests and  
467 measures used in physical therapy. *Phys Ther* 2006;86:735-743.
- 468 33. de Vet HC, Terwee CB, Ostelo RW, Beckerman H, Knol DL, Bouter LM.  
469 Minimal changes in health status questionnaires: distinction between minimally  
470 detectable change and minimally important change. *Health Qual Life Out*. 2006;  
471 4(1):1.

- 472 34. Bland JM, Altman D. Statistical methods for assessing agreement between two  
473 methods of clinical measurement. *Lancet*, 1986; 327:307–310.
- 474 35. Andresen EM. Criteria for assessing the tools of disability outcomes research.  
475 *Arch Phys Med Rehabil* 2000;81:s15-s20.
- 476 36. Hooper D, Coughlan J, Mullen M. Structural equation modelling: guidelines for  
477 determining model fit. *Electron J Bus Res Methods* 2008;6(1):53–60.
- 478 37. Domazet I, Nemir J, Barl P, Saša Đurić K, Pašalić I, Barić H, Stančić M. 2018.  
479 Validation of the Croatian version of the Oswestry Disability Index. *Eur Spine J*  
480 27:2814–2822. <https://doi.org/10.1007/s00586-018-5757-z>
- 481 38. Igwesi-Chidobe CN, Amarachukwu C, Sorinola IO, Godfrey EL. Translation,  
482 cultural adaptation and psychometric testing of Igbo fear avoidance beliefs  
483 questionnaire in mixed rural and urban Nigerian populations with chronic low  
484 back pain. *PLoS ONE* 2019;14(5): e0216482.  
485 <https://doi.org/10.1371/journal.pone.0216482>
- 486 39. Adamu AS, Ibrahim AA, Ahmad, YA, Akindele MA, Kaka B, Mukhtar NB.  
487 Cross-Cultural Adaptation and Validation of the Hausa Version of the Oswestry  
488 Disability Index 2.1a for Patients with Low Back Pain. *Spine* 2019; doi:  
489 10.1097/brs.0000000000003068
- 490 40. Yao M, Wang Li, Yang L, Huang P, Sun Y, Wang Y et al. A Systematic  
491 Review of Cross-cultural Adaptation of the Oswestry Disability Index. *Spine*  
492 2016; 41: E1470–E1478.
- 493 41. Miekisiak M, Kollataj M, Dobrogowski J, Kloc W, Libionka W, Banach M, et  
494 al. Validation and cross-cultural adaptation of the Polish version of the Oswestry  
495 Disability Index. *Spine* 2013;38(4):E237–43.
- 496 42. Valasek T, Varga PP, Szövérfi Z, Kumin M, Fairbank J, Lazary A, et al.

- 497 Reliability and validity study on the Hungarian versions of the Oswestry  
498 Disability Index and the Quebec Back Pain Disability Scale. *Eur Spine J*  
499 2013;22(5):1010–18.
- 500 43. Lue YJ, Hsieh CL, Huang MH, Lin GT, Lu YM. Development of a Chinese  
501 version of the Oswestry Disability Index version 2.1. *Spine* 2008;33(21):2354–  
502 60.
- 503 44. Shah S, Balaganapathy M. Reliability and validity study of the Gujarati version  
504 of the Oswestry Disability Index 2.1a. *J Back Musculoskelet*  
505 *Rehabil*2017;22;30(5):1103–1109.
- 506 45. Gamus D, Glasser S, Langner E, Beth-Hakimian A, Caspi I, Carmel N, et al.  
507 Psychometric properties of the Hebrew version of the Oswestry Disability Index.  
508 *J Back Musculoskelet Rehabil* 2016;1–9.
- 509 46. Algarni AS, Ghorbel S, Jones JG, Guerzmazi M. Validation of an Arabic  
510 version of the Oswestry index in Saudi Arabia. *Ann Phys Rehabil Med*  
511 2014;57(9-10):653–63.
- 512 47. Payares K, Lugo LH, Morales V, Londono A. Validation in Colombia of the  
513 Oswestry disability questionnaire in patients with low back pain. *Spine*  
514 2011;36(26):E1730–5.
- 515 48. Pekkanen L, Kautiainen H, Ylinen J, Petri S, Häkkinen A. Reliability and  
516 Validity Study of the Finnish Version 2.0 of the Oswestry Disability Index .  
517 *Spine* 2011; 36:332–338.
- 518 49. Gabel CP, Cuesta-Vargas A, Qian M, Vengust R, Berlemann U, Aghayev E, et  
519 al. The Oswestry Disability Index, confirmatory factor analysis in a sample of  
520 35,263 verifies a one-factor structure but practicality issues remain. *Eur Spine J*  
521 2017;26(8):2007–2013.



522 **Supporting Information**

523 **S1Data.** The ODI validity data (n=136)

524 **S2 Data.** The ODI-Yoruba test-retest reliability data

525 **S3 Document.** Ìgbéléwòn Bèbèré Èyìn Dídùn ti Oswestry (The Yoruba Oswestry

526 Disability Index) (Word doc.).

**Fig 1: The principal component analysis derived 2-factor model with correlated errors. Models 1 (with items: pain and lifting) and 2 (with items: personal care, walking, sitting, standing, sleeping, sex, social life and travelling) represents pain and pain-related activity, and common activities of daily living. Error terms are represented by u1-10.**

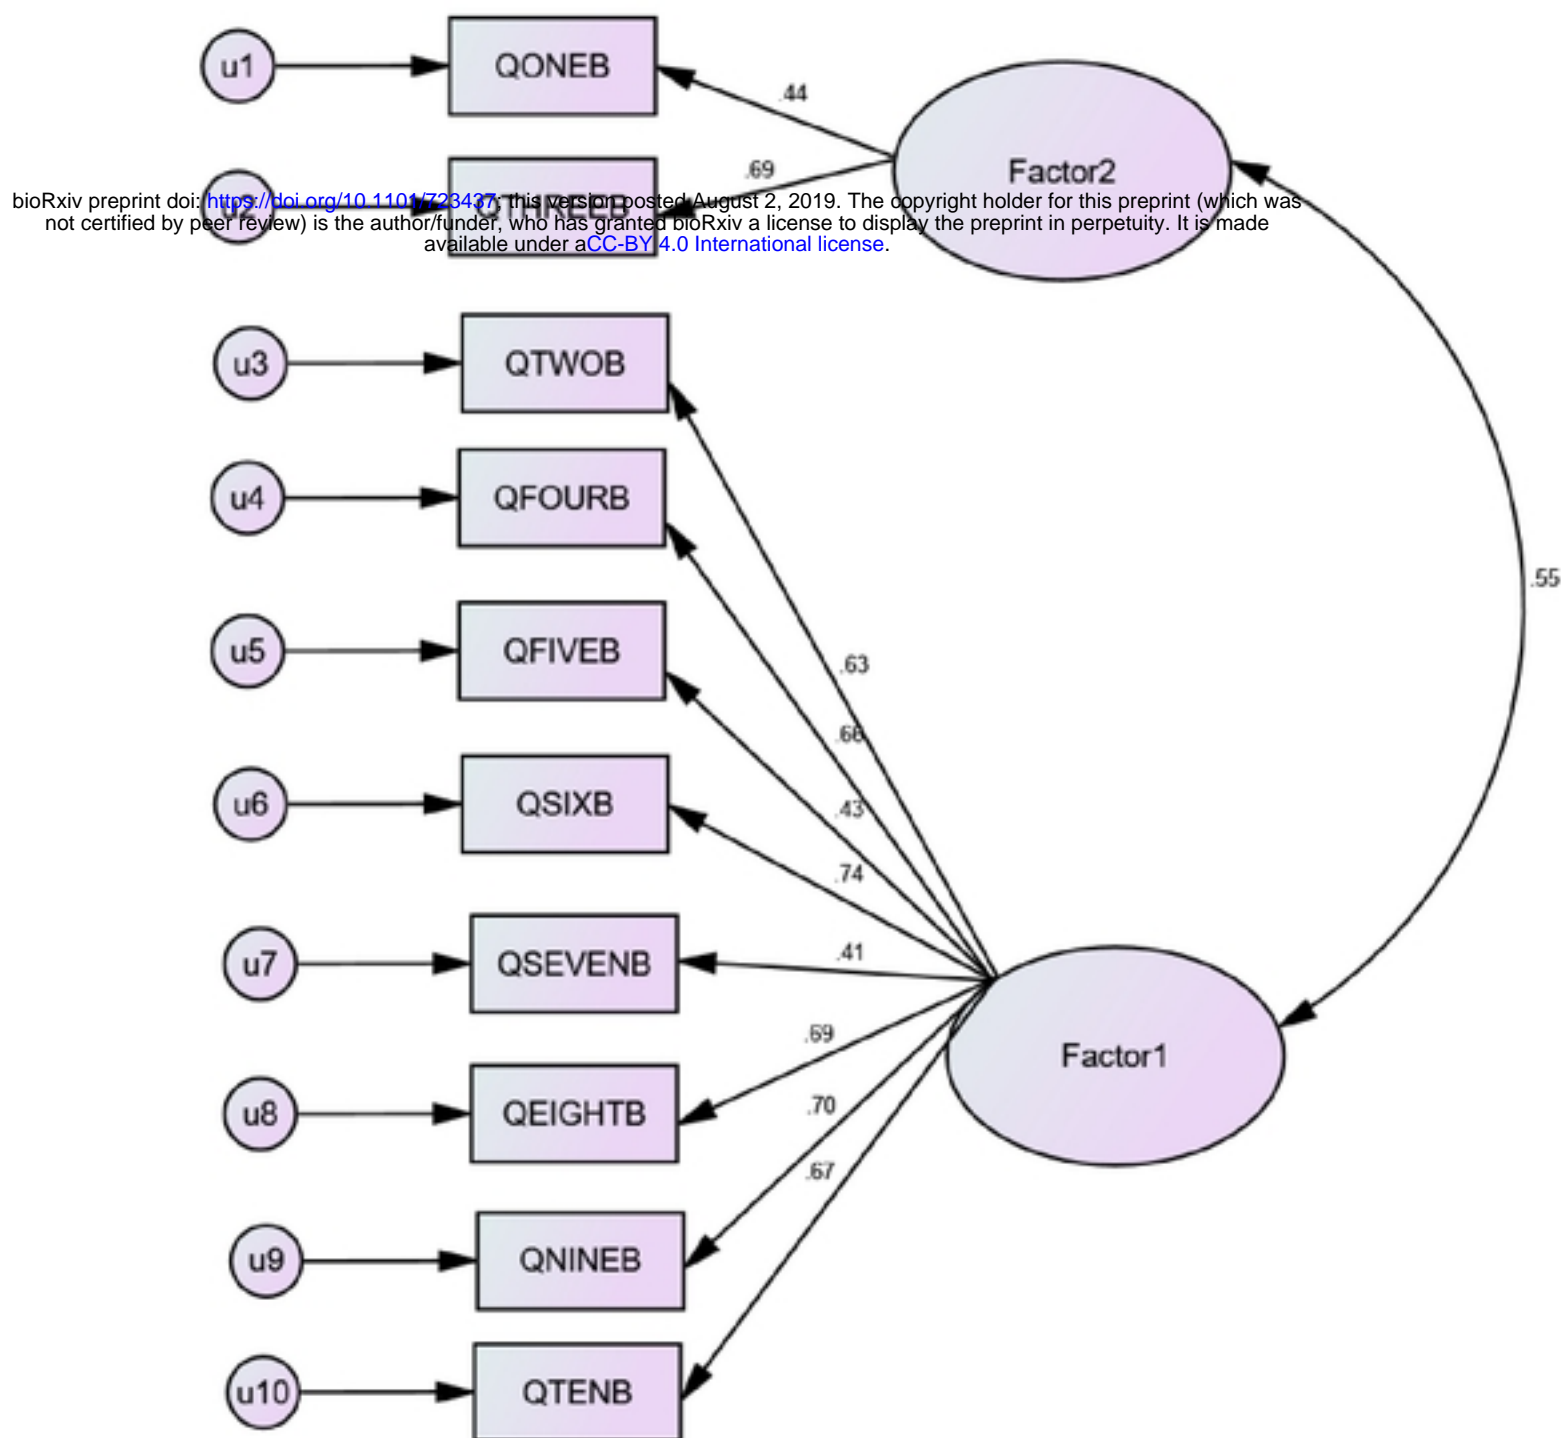

Source: https://www.biorxiv.org/content/10.1101/723437v1.full.pdf
